# Supplementary material for: The Epithelial Sodium Channel—An Underestimated Drug Target
Source: MDPI journal article supplement (doi:10.3390/ijms24097775), 2023-04-24
Supplement: s1 [file s1]

**Table S1. Mutations in *SCNN1A* ( $\alpha$ -ENaC gene) which cause systemic pseudohypoaldosteronism (autosomal recessive PHA-1, PHA-1B).**

| Variant description<br>NCBI NP_001029.2 | DNA change (cDNA)<br>NCBI RefSeq transcript<br>NM_001038.6 | Variant description NCBI<br>RefSeqGene NG_011945.2<br>(GRCh38:12) | Exon | Variant description<br>chromosomal<br>GRCh38:12<br>NCBI NC_000012.12 | dbSNP<br>variant<br>accession<br>number | Reference |
|-----------------------------------------|------------------------------------------------------------|-------------------------------------------------------------------|------|----------------------------------------------------------------------|-----------------------------------------|-----------|
| p.(Arg56*)                              | c.166C>T                                                   | g.7740C>T                                                         | 2    | g.6374618G>A                                                         | rs778872550                             | [272]     |
| p.(Cys63*)                              | c.189C>A                                                   | g.7763C>A                                                         | 2    | g.6374595G>T                                                         |                                         | [273]     |
| p.(Ile68Thrfs*76)                       | c.203_204del                                               | g.7777_7778del                                                    | 2    | g.6374580_6374581del                                                 | rs765835593                             | [135]     |
| p.(His69Arg)                            | c.206A>G                                                   | g.7780A>G                                                         | 2    | g.6374578T>C                                                         |                                         | [274]     |
| p.(Arg73Cys)                            | c.217C>T                                                   | g.7791C>T                                                         | 2    | g.6374567G>A                                                         | rs763345732                             | [275]     |
| p.(Gln101Lys)                           | c.301C>A                                                   | g.7875C>A                                                         | 2    | g.6374483G>T                                                         |                                         | [152]     |
| p.(Cys133Tyr)                           | c.398G>A                                                   | g.7972G>A                                                         | 2    | g.6374386C>T                                                         |                                         | [276]     |
| p.(Arg139Lys)                           | c.416G>A                                                   | g.7990G>A                                                         | 2    | g.6374368C>T                                                         | rs370256768                             | [277]     |
| p.(Thr169Serfs*36)                      | c.505_506del                                               | g.18736_18737del                                                  | 3    | g.6363622_6363623del                                                 | rs1014590535                            | [272]     |
| p.(Pro197Alafs*9)                       | c.588dup                                                   | g.18819dup                                                        | 3    | g.6363539dup                                                         |                                         | [273]     |
| p.(Ala200Glyfs*6)                       | c.598dup                                                   | g.18829dup                                                        | 3    | g.6363532dup                                                         | rs759611286                             | [274]     |
| p.?                                     | c.684+2T>A                                                 | g.18917T>A                                                        |      | g.6363441A>T                                                         |                                         | [278]     |
| p.?                                     | c.685-1G>A                                                 | g.20116G>A                                                        |      | g.6362242C>T                                                         |                                         | [145]     |
| p.(Ser243Pro)                           | c.727T>C                                                   | g.20159T>C                                                        | 4    | g.6362199A>G                                                         | rs776069930                             | [269]     |
| p.(Val245Trpfs*4)                       | c.729delA                                                  | g.20161del                                                        | 4    | g.6362197del                                                         | rs1592074026                            | [279]     |
| p.(Val245Glyfs*65)                      | c.729-730delAG                                             | g.20161_20162del                                                  | 4    | g.6363196_6363197del                                                 |                                         | [280]     |
| p.(Val248*)                             | c.742del                                                   | g.20174del                                                        | 4    | g.6362184del                                                         |                                         | [273]     |
| p.(Glu272Glyfs*39)                      | c.814dup                                                   | g.20246dup                                                        | 4    | g.6362112dup                                                         | rs747904876                             | [281]     |
| p.?                                     | c.875+2dup                                                 | g.20309dup                                                        |      | g.6362049dup                                                         |                                         | [282]     |
| p.?                                     | c.876+2delGAGT                                             | g.20310del                                                        |      | g.6362048del                                                         |                                         | [283]     |
| p.(Gly327Cys)                           | c.979G>T                                                   | g.26581G>T                                                        | 5    | g.6355777C>A                                                         | rs974854786                             | [284]     |
| p.(Tyr436Ilefs*46)                      | c.1305del                                                  | g.27865del                                                        | 8    | g.6354493del                                                         | rs758014063                             | [272]     |
| p.(Arg438Glyfs*44)                      | c.1311del                                                  | g.27871del                                                        | 8    | g.6354487del                                                         |                                         | [281]     |
| p.(Asn441Thrfs*41)                      | c.1322_1322delA                                            | g.27882del                                                        | 8    | g.6354477del                                                         |                                         | [283]     |

| Variant description<br>NCBI NP_001029.2 | DNA change (cDNA)<br>NCBI RefSeq transcript<br>NM_001038.6 | Variant description NCBI<br>RefSeqGene NG_011945.2<br>(GRCh38:12) | Exon | Variant description<br>chromosomal<br>GRCh38:12<br>NCBI NC_000012.12 | dbSNP<br>variant<br>accession<br>number | Reference                                    |
|-----------------------------------------|------------------------------------------------------------|-------------------------------------------------------------------|------|----------------------------------------------------------------------|-----------------------------------------|----------------------------------------------|
| p.(Tyr447Leufs*13)                      | c.1339dup                                                  | g.27899dup                                                        | 8    | g.6354459dup                                                         | rs754323537                             | [285]                                        |
| p.(His450Lysfs*11)                      | c.1344_1347dup                                             | g.27904_27907dup                                                  | 8    | g.6354453_6354456dup                                                 |                                         | [273]<br>reported:c.1<br>342_1343ins<br>TACA |
| p.(Trp453Glyfs*29)                      | c.1356del                                                  | g.27916del                                                        | 8    | g.6354443del                                                         |                                         | [284]                                        |
| p.?                                     | c.1360+1G>T                                                | g.27921G>T                                                        |      | g.6354437C>A                                                         | rs573376286                             | [277]                                        |
| p.?                                     | c.1361-2A>G                                                | g.32951A>G                                                        |      | g.6349407T>C                                                         |                                         | [273]                                        |
| p.?                                     | c.1439+1G>C                                                | g.33032G>C                                                        |      | g.6349326C>G                                                         | rs1369791519                            | [281]                                        |
| p.(Tyr484Thrfs*13)                      | c.1449del                                                  | g.33146del                                                        | 10   | g.6349212del                                                         | rs756434927                             | [279]                                        |
| p.(Gln485*)                             | c.1453C>T                                                  | g.33150C>T                                                        | 10   | g.6349208G>A                                                         |                                         | [283]                                        |
| p.(Arg492*)                             | c.1474C>T                                                  | g.33171C>T                                                        | 10   | g.6349187G>A                                                         | rs775543049                             | [276]                                        |
| p.(Gln499Arg)                           | c.1496A>G                                                  | g.33193A>G                                                        | 10   | g.6349165T>C                                                         |                                         | [283]                                        |
| p.(Arg508*)                             | c.1522C>T                                                  | g.33377C>T                                                        | 11   | g.6348981G>A                                                         | rs137852634                             | [135]                                        |
| p.(Val524Ala)                           | c.1571T>C<br>(c.1640T>C<br>NM_0011589575.1)                | Not available for<br>NM_0011589575.1                              | 12   | g.6348785A>G<br>(NM_0011589575.1)                                    |                                         | [275]<br>reported:<br>V547A                  |
| p.(Phe528del)                           | c.1582_1584del                                             | g.33584_33586del                                                  | 12   | g.6348777_6348779del                                                 | rs61759913                              | [286]                                        |
| p.(Gly560Ser)                           | c.1678G>A                                                  | g.34153G>A                                                        | 13   | g.6348205C>T                                                         | rs772866436                             | [287]                                        |
| p.(Ser562Pro)                           | c.1684T>C                                                  | g.34159T>C                                                        | 13   | g.6348199A>G                                                         |                                         | [288]                                        |
| p.(Ser562Leu)                           | c.1685C>T                                                  | g.34160C>T                                                        | 13   | g.6348198G>A                                                         | rs137852635                             | [279]                                        |
| p.(Ser565Tyr)                           | c.1694C>A                                                  | g.34169C>A                                                        | 13   | g.6348189G>T                                                         |                                         | [283]                                        |

**Table S2. Mutations in *SCNN1B* ( $\beta$ -ENaC gene) which cause systemic pseudohypoaldosteronism (autosomal recessive PHA-1, PHA-1B).**

| Variant description<br>protein<br>NCBI NP_000327.2 | DNA change (cDNA)<br>RefSeq transcript<br>NCBI NM_000336.3 | Variant description<br>RefSeqGene<br>NCBI NG_011908.2<br>(GRCh38:16) | Exon | Variant description<br>chromosomal<br>GRCh38:16<br>NCBI NC_000016.10 | Variant<br>accession<br>number<br>(dbSNP) | Reference      |
|----------------------------------------------------|------------------------------------------------------------|----------------------------------------------------------------------|------|----------------------------------------------------------------------|-------------------------------------------|----------------|
| na                                                 | 17bp frameshift<br>mutation in exon2                       | na                                                                   | 2    | na                                                                   |                                           | [275]          |
| p.(Tyr29*)                                         | c.87C>A                                                    | g.51417C>A                                                           | 2    | g.23348686C>A                                                        |                                           | [274]          |
| p.(Gly37Ser)                                       | c.109G>A                                                   | g.51439G>A                                                           | 2    | g.23348708G>A                                                        | rs137852706                               | [135]          |
| p.(Leu174Tyrfs*12)                                 | c.520_521insA                                              | g.55740_55741insA                                                    | 3    | g.23353009_23353010insA                                              |                                           | [272]          |
| p.?                                                | c.585+1G>A                                                 | g.55806G>A                                                           |      | g.23353075G>A                                                        | rs1411771150                              | [289]          |
| p.(Gln213*)                                        | c.637C>T                                                   | g.58081C>T                                                           | 4    | g.23355350C>T                                                        |                                           | [290]          |
| p.(Glu217Argfs*38)                                 | c.648dup                                                   | g.58092dup                                                           | 4    | g.23355361dup                                                        | rs747116196                               | [291]          |
| p.(Ala228Hisfs*8)                                  | c.682del                                                   |                                                                      | 4    | g.23355395del                                                        |                                           | [292]          |
| p.(Ile264Serfs*16)                                 | c.789del                                                   | g.70599del                                                           | 5    | g.23367868del                                                        |                                           | [272]          |
| p.(Tyr306Thrfs*13)                                 | c.915del                                                   | g.74064del                                                           | 6    | g.23371333del                                                        | rs1275275977                              | [291]          |
| p.(Tyr326*)                                        | c.978C>A                                                   |                                                                      | 6    | g.23371396C>A                                                        |                                           | [293]          |
| p.(Asn416Glnfs*35)                                 | c.1245dup                                                  | g.78561dup                                                           | 8    | g.23375830dup                                                        |                                           | [294]          |
| p.?                                                | c.1271-1G>C                                                | g.79895G>C                                                           |      | g.23377164G>C                                                        |                                           | [295]          |
| p.(Leu430Tyrfs*3)                                  | c.1288del                                                  | g.79913del                                                           | 9    | g.23377182del                                                        |                                           | [296]          |
| p.(Gln431Argfs*2)                                  | c.1290delA                                                 |                                                                      | 9    | g.23377184del                                                        |                                           | [146]          |
| p.?                                                | c.1346+1G>A                                                | g.79972G>A                                                           |      | g.23377241G>A                                                        |                                           | [274]          |
| p.(Thr451Aspfs*6)                                  | c.1348_1361del<br>(c.1350_1363del)                         |                                                                      | 10   | g.23377332_23377345del                                               |                                           | [146]          |
| p.?                                                | c.1466+1G>A                                                | g.81499G>A                                                           | 11   | g.23378768G>A                                                        | rs1290855631                              | [296]          |
| p.?                                                | c.1542+1G>A                                                | g.82901G>A                                                           | 12   | g.23380170G>A                                                        | rs550424284                               | [284]<br>[285] |
| p.(Asp546Asn)                                      | c.1636G>A                                                  | g.83245G>A                                                           | 13   | g.23380514G>A                                                        | rs112069765                               | [151]          |
|                                                    | >1300 bp deletion                                          |                                                                      |      |                                                                      |                                           | [297]          |

**Table S3. Mutations in *SCNN1G* ( $\gamma$ -ENaC gene) which cause systemic pseudohypoaldosteronism (autosomal recessive PHA-1, PHA-1B).**

| Variant description protein<br>NCBI NP_001030.2 | DNA change (cDNA)<br>RefSeq transcript<br>NCBI NM_001039.4 | Variant description<br>RefSeqGene<br>NCBI NG_011909 .1<br>(GRCh38:16) | Exon | Variant description<br>chromosomal<br>GRCh38:16 NCBI<br>NC_000016.10 | Variant<br>accession<br>number<br>(dbSNP) | Reference                          |
|-------------------------------------------------|------------------------------------------------------------|-----------------------------------------------------------------------|------|----------------------------------------------------------------------|-------------------------------------------|------------------------------------|
| p.(Leu34_Thr36del)                              | c.109_114del                                               |                                                                       | 2    | g.23186380_23186385del                                               |                                           | [298]<br>reported:<br>c.102_107del |
| p.(Ala63Pro)                                    | c.187G>C                                                   | g.8740G>C                                                             | 2    | g.23186458G>C                                                        |                                           | [286]                              |
| p.(Lys106_Ser108delinsAsn)                      | c.318 -1G>A                                                | g.11652G>A                                                            |      | g.23189370G>A                                                        | rs1567262640                              | [299]                              |
| p.(Thr176Argfs*9)                               | c.527_528delCA                                             | g.11862_11863del                                                      | 3    | g.23189580_23189581del                                               |                                           | [283]                              |
| p.(Arg440*)                                     | c.1318C>T                                                  | g.34983C>T                                                            | 9    | g.23212701C>T                                                        |                                           | [290]                              |
| p.?                                             | c.1570 -1G>A                                               | g.37370G>A                                                            |      | g.23215088G>A                                                        | rs1596779402                              | [300]                              |
| p.(Val543Leufs*56)                              | c.1626del                                                  | g.37427del                                                            | 13   | g.23215145del                                                        | rs1596779433                              | [300]                              |
